# Cerebral Blood Volume (CBV) in Humans during Normo- and Hypocapnia

## Influence of Nitrous Oxide (N<sub>2</sub>O)

Peter Reinstrup, M.D., Ph.D.,\* Erik Ryding, M.D., Ph.D.,† Tomas Ohlsson, Ph.D.,‡ Peter Lee Dahm, M.D., Ph.D.,§ Tore Uski, M.D., Ph.D.||

**Background:** It is generally argued that variations in cerebral blood flow create concomitant changes in the cerebral blood volume (CBV). Because nitrous oxide (N<sub>2</sub>O) inhalation both increases cerebral blood flow and may increase intracranial pressure, it is reasonable to assume that N<sub>2</sub>O acts as a general vasodilator in cerebral vessels both on the arterial and on the venous side. The aim of the current study was to evaluate the effect of N<sub>2</sub>O on three-dimensional regional and global CBV in humans during normocapnia and hypocapnia.

**Methods:** Nine volunteers were studied under each of four conditions: normocapnia, hypocapnia, normocapnia + 40–50% N<sub>2</sub>O, and hypocapnia + 40–50% N<sub>2</sub>O. CBV was measured after <sup>99m</sup>Tc-labeling of blood with radioactive quantitative registration via single photon emission computer-aided tomography scanning.

**Results:** Global CBV during normocapnia and inhalation of 50% O<sub>2</sub> was  $4.25 \pm 0.57\%$  of the brain volume ( $4.17 \pm 0.56$  ml/100 g, mean  $\pm$  SD) with no change during inhalation of 40–50% N<sub>2</sub>O in O<sub>2</sub>. Decreasing carbon dioxide (CO<sub>2</sub>) by 1.5 kPa (11 mmHg) without N<sub>2</sub>O inhalation and by 1.4 kPa (11 mmHg) with N<sub>2</sub>O inhalation reduced CBV significantly ( $F = 57$ ,  $P < 0.0001$ ), by  $0.27 \pm 0.10\%$  of the brain volume per kilopascal ( $0.26 \pm 0.10$  ml  $\cdot$  100 g<sup>-1</sup>  $\cdot$  kPa<sup>-1</sup>) without N<sub>2</sub>O inhalation and by  $0.35 \pm 0.22\%$  of the brain volume per kilopascal ( $0.34 \pm 0.22$  ml  $\cdot$  100 g<sup>-1</sup>  $\cdot$  kPa<sup>-1</sup>) during N<sub>2</sub>O inhalation (no significant difference). The amount of carbon dioxide significantly altered the regional distribution of CBV ( $F = 47$ ,  $P < 0.0001$ ), corresponding to a regional difference in  $\Delta$ CBV when CO<sub>2</sub> is changed. N<sub>2</sub>O inhalation did not significantly change the distribution of regional CBV ( $F = 2.4$ ,  $P = 0.051$ ) or  $\Delta$ CBV/ $\Delta$ CO<sub>2</sub> in these nine subjects.

**Conclusions:** Nitrous oxide inhalation had no effect either on CBV or on the normal CBV–CO<sub>2</sub> response in humans.

NITROUS oxide (N<sub>2</sub>O) has been safely used for anesthesia during neurosurgical procedures for half a century because it was thought to have little impact on cerebral circulation.<sup>1,2</sup> There are conflicting reports in the literature regarding the effects of N<sub>2</sub>O on the brain, primarily

because of species differences in both response and potency and also because of interactions with other drugs or interventions.<sup>3,4</sup>

However, in humans, N<sub>2</sub>O increases cerebral blood flow (CBF)<sup>5–7</sup> and may increase intracranial pressure (ICP).<sup>8,9</sup> Evidence from both two- and three-dimensional CBF studies<sup>5–7,10</sup> support the conclusion that N<sub>2</sub>O is a cerebral arterial vasodilator in the absence of other interventions.

It is generally believed that variations in CBF create concomitant changes in the cerebral blood volume (CBV). Because N<sub>2</sub>O inhalation both increases CBF and may increase ICP, it is reasonable to assume that N<sub>2</sub>O acts as a general vasodilator in cerebral vessels both on the arterial and venous side.

The aim of the current study was to evaluate the effect of 40–50% N<sub>2</sub>O on three-dimensional global CBV and in specified anatomical regions (rCBV) in humans during normocapnia and hypocapnia.

## Methods

Ten healthy male volunteers participated in the study. One subject was excluded because of technical failure in labeling of the erythrocytes. The remaining subjects were 29–40 yr old (mean, 33 yr). The ethics committee for human studies and the isotope committee at the University of Lund (Lund, Sweden) approved the study. Written informed consent was obtained from each participant.

### Experimental Procedure

Each subject was given a 200-mg oral dose of Iodine for thyroid protection. For radioactive labeling of the erythrocytes, 2 ml Stannous agent was administered through a dorsal hand vein, and, half an hour later, 600 MBq <sup>99m</sup>Tc-pertechnetate was administered through an antecubital vein, later used for blood sampling.

The subjects were equipped with a face mask held in place by rubber bands, and, after eliminating air leaks, they were positioned in the single photon emission computed tomography (SPECT) camera. All participants were breathing spontaneously during the measurement time.

Four SPECT measurements were performed after 15 min of steady state conditions: the first and second were during inhalation of atmospheric air with addition of extra oxygen to a total of approximately 50% O<sub>2</sub> either during normocapnia (end-tidal partial pressure of carbon

\* Associate Professor, Departments of Anesthesiology and Clinical Pharmacology, † Associate Professor, Department of Clinical Neurophysiology, ‡ Research Assistant, Department of Radiation Physics, § Associate Professor, Department of Anesthesiology, || Associate Professor, Departments of Clinical Pharmacology and Neurosurgery.

Received from the Departments of Anesthesiology, Clinical Pharmacology, Clinical Neurophysiology, Radiation Physics, and Neurosurgery, University Hospital, Lund, Sweden. Submitted for publication January 12, 2001. Accepted for publication May 3, 2001. Supported by grant No. B91-14X-00084-27A from the Crafoord Foundation for medical research, Swedish Medical Research Council, Lund, Sweden, and the AGA AB Medical Scientific Foundation, Stockholm, Sweden.

Address correspondence to Dr. Reinstrup: Department of Anesthesia and Intensive Care, University of Lund, S 221 85 Lund, Sweden. Address electronic mail to: peter.reinstrup@skane.se. Reprints will not be available from the authors. Individual article reprints may be purchased through the Journal Web site, www.anesthesiology.org.

dioxide approximately 5.5 kPa [41 mmHg]) or hypocapnia (end-tidal carbon dioxide [ETCO<sub>2</sub>] decreased by more than 1 kPa [7.5 mmHg]); the third and fourth were during inhalation of a 40–50% N<sub>2</sub>O mixture in 30% O<sub>2</sub>, also during normocapnia and hypocapnia. Hypocapnia was achieved by guidance of the participants. The order between the normocapnic and the hypocapnic conditions was systematically varied.

The gases were mixed with flowmeters (unit 760; Siemens-Elma, Solna, Sweden). ETCO<sub>2</sub> and concentrations of N<sub>2</sub>O and O<sub>2</sub> in the inspiratory and expiratory gas mixtures were recorded on a Datex Capnomac Ultima (Datex, Helsinki, Finland). Noninvasive blood pressure, heart rate, and arterial oxygen saturation were recorded for 5 min each using an HP Merlin (Hewlett Packard, Boeblingen, Germany).

### SPECT Measurements

Measurement of the cerebral distribution of the <sup>99m</sup>Tc-labeled erythrocytes (and remaining <sup>99m</sup>Tc in plasma) was performed with use of a Ceraspect SPECT camera (DSI, Waltham, MA), giving a three-dimensional picture of the rCBV distribution. The distribution of <sup>99m</sup>Tc in the brain was recorded in 64 contiguous, 1.67-mm-thick slices, parallel to the orbitomeatal line, with the center of the lowest slice located approximately 1 cm below the orbitomeatal line. The interslice and intraslice resolution was approximately 10–15 mm. The head position was controlled with external radioactive markers on the external auditory meatus and the nasion. The SPECT recording (in a photo window of 126–154 KeV) was corrected for scattered radiation by subtraction of radioactivity simultaneously recorded in a lower energy window (112–126 KeV), and attenuation was then corrected with a factor of 0.15/cm.

For quantitation into anatomic regions (whole brain and lobes) of the three-dimensional distribution, the SPECT images were summed into 10 contiguous, 1-cm-thick slices and were analyzed with a region of interest (ROI) program based on an anatomic atlas.<sup>11</sup> The regions of interest were semi-automatically positioned within each slice, with adjustment to the subject's brain size, using anatomic markers as skull and position of major blood vessels (veins). The major veins were mainly (with

the exception of the occipital region) located outside the ROIs of the brain lobes, but some were inevitably included in the ROI of the whole brain.

### Blood Tests

To translate the measured brain radioactivity into blood volume, 5 ml venous blood was sampled every 20 min from an antecubital vein. The venous blood was collected in test tubes containing sodium heparin. The venous blood samples were centrifuged at 1,000g for 5 min. Total radioactivity concentrations in the whole blood, erythrocytes, and plasma were measured in an automatic well-type  $\gamma$  counter (1282 Compugamma; LKB Pharmacia, Åbo, Finland). The counting efficiency of the  $\gamma$  counter was determined using sources of <sup>99m</sup>Tc-pertechnetate calibrated in a gas ionization chamber (CRC-35R; Capintec, Ramsey, NJ) with geometry similar to that of the blood samples. All radioactivity measurements were decay corrected to the time of <sup>99m</sup>Tc-pertechnetate injection.

The measured radioactivity for erythrocytes and plasma were each fitted to a monoexponential decay curve and summed to a biexponential clearance curve. Values from the biexponential clearance curve at the time of the SPECT recording were used to calculate CBV.

### Calculations and Statistical Methods

The regional radioactivity in the SPECT <sup>99m</sup>Tc measurements was translated into CBV level by division with the radioactivity per volume in the blood tests and was expressed as a percentage of the corresponding brain volume. When calculating the CBV per 100 g brain tissue, a density of 1.019 was used.<sup>12</sup> The values from the ROIs at normocapnia were equal to normal regional distribution of CBV. The carbon dioxide response was calculated as the change in CBV divided by the corresponding alteration in arterial carbon dioxide tension (Paco<sub>2</sub>). The factor used to convert kilopascals to millimeters of mercury was 0.1333.

All values are given as mean  $\pm$  SD. Repeated-measures analysis of variance was used for statistical comparison of the groups. In the analysis of variance test of the CBV data, the different regions of interest were within-group

**Table 1. Physiologic Parameters during the Different Experimental Conditions**

|                                | Normo                           | Hypo                            | Normo + 43% N <sub>2</sub> O    | Hypo + 42% N <sub>2</sub> O     |
|--------------------------------|---------------------------------|---------------------------------|---------------------------------|---------------------------------|
| n                              | 9                               | 9                               | 9                               | 9                               |
| ETCO <sub>2</sub> (kPa) (mmHg) | 5.4 $\pm$ 0.3<br>40.4 $\pm$ 2.6 | 3.9 $\pm$ 0.4<br>28.9 $\pm$ 3.0 | 5.2 $\pm$ 0.4<br>39.2 $\pm$ 2.7 | 3.8 $\pm$ 0.5<br>28.5 $\pm$ 3.8 |
| Sao <sub>2</sub> (%)           | 99.3 $\pm$ 1.0                  | 100 $\pm$ 0.5                   | 100 $\pm$ 0.7                   | 100 $\pm$ 0.5                   |
| BP <sub>mean</sub> mmHg        | 86 $\pm$ 10                     | 91 $\pm$ 21                     | 93 $\pm$ 12                     | 92 $\pm$ 9                      |
| Pulse rate (beats/min)         | 59 $\pm$ 10                     | 62 $\pm$ 10                     | 61 $\pm$ 10                     | 60 $\pm$ 7                      |

Values are presented as mean  $\pm$  SD; n = number of participants. There were no values significantly different from the control condition (normo) other than the end-tidal carbon dioxide (ETCO<sub>2</sub>) concentration.

Hypo = hypocapnia; BP<sub>mean</sub> = mean arterial blood pressure; Sao<sub>2</sub> = peripheral oxygen saturation; N<sub>2</sub>O = nitrous oxide.

**Table 2. CBV Values in Percentage of the Brain Volume, Globally (Global CBV), and through Different Parts of the Brain**

|             | Normo     | Hypo      | Normo + 43% N <sub>2</sub> O | Hypo + 42% N <sub>2</sub> O |
|-------------|-----------|-----------|------------------------------|-----------------------------|
| Global CBV  | 4.2 ± 0.6 | 3.8 ± 0.5 | 4.3 ± 0.6                    | 3.8 ± 0.5                   |
| Cerebellum  | 4.0 ± 0.7 | 3.8 ± 0.7 | 4.0 ± 0.8                    | 3.6 ± 0.6                   |
| Frontal     | 2.6 ± 0.4 | 2.2 ± 0.4 | 2.9 ± 0.5                    | 2.4 ± 0.3                   |
| Temporal    | 4.5 ± 0.7 | 4.1 ± 0.6 | 4.5 ± 0.7                    | 4.1 ± 0.6                   |
| Parietal    | 3.2 ± 0.5 | 2.7 ± 0.5 | 3.4 ± 0.6                    | 2.7 ± 0.4                   |
| Occipital   | 6.1 ± 1.2 | 5.5 ± 1.3 | 5.9 ± 1.5                    | 5.3 ± 1.5                   |
| Subcortical | 2.9 ± 0.5 | 2.4 ± 0.4 | 3.1 ± 0.6                    | 2.6 ± 0.4                   |

Values are presented as mean ± SD; number of participants was 9.

Normo = normocapnia; hypo = hypocapnia; CBV = cerebral blood volume; N<sub>2</sub>O = nitrous oxide.

factors, and ET<sub>CO<sub>2</sub></sub> and air-O<sub>2</sub>/O<sub>2</sub>-N<sub>2</sub>O were between-groups factors. The *P* values for the analysis of variance interaction terms were corrected for departure from sphericity,<sup>13</sup> making the evaluation more conservative. *P* ≤ 0.05 was considered statistically significant.

## Results

Physiologic values of the four groups are presented in table 1. Except for the PaCO<sub>2</sub> differences between the normocapnic and hypocapnic groups, there were no statistically significant differences.

### Effects of CO<sub>2</sub> and N<sub>2</sub>O on Global CBV

Without N<sub>2</sub>O inhalation, global CBV during normocapnia (ET<sub>CO<sub>2</sub></sub>, 5.4 kPa [41 mmHg]) was 4.25 ± 0.57% of the brain volume (4.17 ± 0.56 ml/100 g). Global CBV was unchanged (4.23 ± 0.58% of the brain volume (4.15 ± 0.57 ml/100 g)) during inhalation of 40–50% N<sub>2</sub>O in O<sub>2</sub> (ET<sub>CO<sub>2</sub></sub>, 5.2 kPa [39 mmHg]; table 2).

Decreasing CO<sub>2</sub> by 1.5 kPa (11 mmHg) without N<sub>2</sub>O inhalation and by 1.4 kPa (11 mmHg) with N<sub>2</sub>O inhalation reduced CBV significantly (*F* = 57, *P* < 0.0001), yielding a change of 0.27 ± 0.10% of the brain blood volume per kilopascal (0.26 ± 0.1 ml · 100 g<sup>-1</sup> · kPa<sup>-1</sup>) without N<sub>2</sub>O inhalation and 0.35 ± 0.22% of the brain blood volume per kilopascal (0.34 ± 0.21 ml · 100 g<sup>-1</sup> · kPa<sup>-1</sup>) during N<sub>2</sub>O inhalation (no significant effect of N<sub>2</sub>O addition; fig. 1; whole brain).

Using the individual ΔCBV/ΔCO<sub>2</sub> of each subject to calculate CBV values at an ET<sub>CO<sub>2</sub></sub> of 5.45 kPa (41 mmHg) yielded a global CBV during N<sub>2</sub>O inhalation of 4.24 ± 0.63% of the brain volume (4.16 ± 0.62 ml/100 g) and a CBV difference between with and without N<sub>2</sub>O inhalation of 0.00 ± 0.20% of the brain volume (0.00 ± 0.20 ml/100 g).

### Effects of CO<sub>2</sub> and N<sub>2</sub>O on Regional CBV

The amount of carbon dioxide significantly altered the regional distribution of CBV (*F* = 47, *P* < 0.0001; fig. 1), corresponding to a regional difference in ΔCBV/ΔCO<sub>2</sub>.

N<sub>2</sub>O inhalation did not significantly change the distribution of rCBV (*F* = 2.4, *P* = 0.051) or ΔCBV/ΔCO<sub>2</sub> in these nine subjects (fig. 1). The absolute CBV for the different regions is given in table 2.

## Discussion

Few human studies deal with the effect of anesthetics on the CBV, contrary to the large number of CBF studies dealing with this subject. In search of drugs or procedures reducing CBV, the effects of anesthesia on CBF and ICP have been used as indirect indicators of CBV effects. Indeed, a correlation has been found between CBF and CBV changes in some physiologic circumstances,<sup>14</sup> which, however, is not always the case,<sup>15</sup> especially in pathologic conditions<sup>16–18</sup> as well as during anesthesia.<sup>19–22</sup> Rapid changes in ICP are generally accepted to be due to a variation in CBV, but considering the magnitude of brain swelling sometimes occurring during neuroanesthesia, one may speculate whether mechanisms other than changes in CBV are involved.

In the current study, we found that in humans during normocapnia, 4.2% of the total brain volume consisted

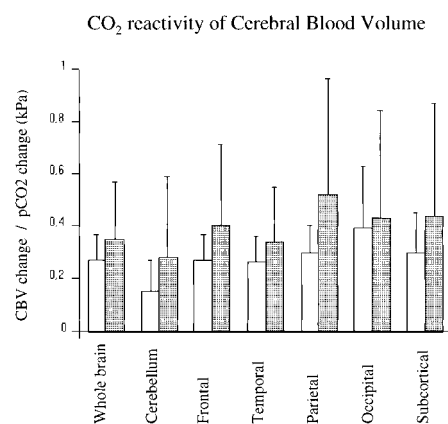

The Cerebral Blood Volume (CBV) change (%) per change in CO<sub>2</sub> (kPa) during inhalation of 50% O<sub>2</sub> (□), and of 40–50% N<sub>2</sub>O in O<sub>2</sub> (■). Mean ± SD (n=9).

**Fig. 1. The cerebral blood volume (CBV) change (%) per change in CO<sub>2</sub> (kPa) during inhalation of 50% O<sub>2</sub> (open bars) and of 40–50% N<sub>2</sub>O in O<sub>2</sub> (filled bars). Mean + SD (n = 9). Pco<sub>2</sub> = partial pressure of carbon dioxide.**



of blood. This finding correlates well with previous studies<sup>23-25</sup> using techniques similar to ours. It is possible that the technique of labeling only the erythrocytes may slightly overestimate or underestimate the regional CBV because there may be local variations in hematocrit depending on the size of the vessels.<sup>26</sup> However, because of larger veins, the occipital region contains approximately twice the blood volume of the subcortical region, and since CO<sub>2</sub> reactivity is equal in both regions, such an effect seems unlikely.

Decreasing ETco<sub>2</sub> by 1.5 kPa (11 mmHg) contracted the cerebral vessels, thereby reducing CBV to 3.8% of the brain volume or by 6.3% of the value at normocapnia per kilopascal (0.9%/mmHg), which represents a vasoreactivity similar to that found by Fortune *et al.*<sup>27</sup> However, we have previously observed<sup>7</sup> a decrease in CBF by 14%/kPa in a group similar to that used in the current study. This corroborates the conclusion by Fortune *et al.*<sup>27</sup> that relative changes in CBF are greater than relative changes in CBV in response to CO<sub>2</sub> variations.

CBV was not homogeneously distributed in the brain. We found relatively high rCBV values in the occipital, temporal, and cerebellar regions (table 2). The reason for this finding is unclear but may be the inclusion of large veins in the ROIs placed over these regions. Furthermore, CO<sub>2</sub> reactivity was lower in these areas compared with the rest of the brain. Because it is well-known that large conducting veins react poorly to vasoactive stimuli, this finding is in accordance with theory.

Inhalation of N<sub>2</sub>O had no influence on global CBV. This is a surprising finding because N<sub>2</sub>O increases ICP in patients with intracranial disorders<sup>8,9</sup> and increases CBV in dogs.<sup>28</sup> However, although Henriksen and Jorgensen<sup>8</sup> reported an ICP increase of 13–40 mmHg, Moss and McDowall<sup>9</sup> only observed a minor increase of 4 mmHg. This may be because of the fact that the patients in these two series all had different intracranial disorders and the fact that the latter investigation was performed during controlled ventilation. Therefore, it may be that the effect of N<sub>2</sub>O on ICP is negligible in the absence of intracranial pathology. N<sub>2</sub>O unquestionably increases CBF in humans during normocapnia,<sup>5-7</sup> presumably including dilatation of precapillary sphincters. The resultant increase in capillary hydrostatic pressure causes effusion of fluid into the extravascular space, particularly in the case of a disrupted blood-brain barrier. This would result in an increased ICP without any changes in CBV.

Nitrous oxide did not alter global CBV during hypocapnia in accordance with the findings of Archer *et al.*<sup>28</sup> in dogs. Contrary to the findings in dogs, we find an unchanged global CBV during normocapnia and therefore a preserved CO<sub>2</sub> response during N<sub>2</sub>O inhalation.

In conclusion, we found that N<sub>2</sub>O inhalation affected neither CBV nor the normal CBV–CO<sub>2</sub> response in humans.

The authors thank the staff at the Department of Clinical Neurophysiology, University Hospital, Lund, Sweden, for their assistance with single photon emission computed tomography scans and isotope delivery.

## References

1. Smith AL, Wohlman H: Cerebral blood flow and metabolism: Effects of anesthetics drugs and techniques. *ANESTHESIOLOGY* 1972; 36:378–400
2. Harp JR, Siesjö BK: Effects of anesthesia on cerebral metabolism, A Basis and Practice of Neuroanesthesia. Edited by Gordon E. Amsterdam, Excerpta Medica, 1975, pp 92–3
3. Artru AA: Cerebral blood flow and metabolism, Clinical Neuroanesthesia. Edited by Black S, Michenfelder JD. New York, Churchill Livingstone, 1998, pp 1–40
4. Phirman JR, Shapiro HM: Modification of nitrous oxide-induced intracranial hypertension by prior induction of anaesthesia. *ANESTHESIOLOGY* 1977; 46:150–1
5. Deutsch G, Samra SK: Effects of nitrous oxide on global and regional cortical blood flow. *Stroke* 1990; 21:1293–8
6. Field LM, Dorrance DE, Krzeminska EK, Barsoum LZ: Effect of nitrous oxide on cerebral blood flow in normal humans. *Br J Anaesth* 1993; 70:154–9
7. Reinstrup P, Ryding E, Algotsson L, Berntman L, Uski T: Effects of nitrous oxide on human regional CBF (SPECT) and isolated pial arteries. *ANESTHESIOLOGY* 1994; 81:396–402
8. Henriksen HT, Jørgensen PB: The effect of nitrous oxide on intracranial pressure in patients with intracranial disorders. *Br J Anaesth* 1973; 45:486–92
9. Moss E, McDowall DG: I.C.P. increases with 50% nitrous oxide in oxygen in severe head injuries during controlled ventilation. *Br J Anaesth* 1979; 51:757–61
10. Manohar M: Regional distribution of porcine brain blood flow during 50% nitrous oxide administration. *Am J Vet Res* 1985; 46:831–5
11. Kretschmann HJ, Weirich W: Neuroanatomy and Cranial Computed Tomography. Stuttgart, Thieme Verlag, 1986, pp 92–6
12. Blatter DD, Bigler ED, Johnson S, Anderson C, Gale SD: A normative database from magnetic resonance imaging, Human Brain Function, Neuroimaging I: Basic Science. By Biegler ED. New York, Plenum, 1996, pp 79–95
13. Kirk RI: Experimental Design. Monterey, California, Brooks/Cole, 1982, pp 259–62
14. Grubb RL, Raichle ME, Eichling JO, Ter-Pogossian MM: The effect of changes in PaCO<sub>2</sub> on cerebral blood volume, blood flow, and vascular transit time. *Stroke* 1974; 5:630–9
15. Cremer JE, Cunningham VJ, Seville MP: Relationship between extraction and metabolism of glucose, blood flow and tissue blood volume in regions of rat brain. *J Cereb Blood Flow Metab* 1983; 3:291–302
16. Gibbs JM, Wise RJS, Leenders KL, Jones T: Evaluation of cerebral perfusion reserve in patients with carotid artery occlusion. *Lancet* 1984; 1:310–4
17. Grubb RL, Raichle ME, Phelps ME, Ratcheson RA: Effect of increased intracranial pressure on cerebral blood volume, blood flow, and oxygen utilization in monkeys. *J Neurosurg* 1975; 43:385–98
18. Artru AA: Reduction of cerebrospinal fluid pressure by hypocapnia: Changes in cerebral blood volume, cerebrospinal fluid volume, and brain tissue water and electrolytes. *J Cereb Blood Flow Metab* 1987; 7:471–9
19. Todd MM, Weeks JB, Warner DS: The influence of intravascular volume expansion on cerebral blood flow and blood volume in normal rats. *ANESTHESIOLOGY* 1993; 78:945–53
20. Weeks JB, Todd MM, Warner DS, Katz J: The influence of halothane, isoflurane, and pentobarbital on cerebral plasma volume in hypocapnic and normocapnic rats. *ANESTHESIOLOGY* 1990; 73:461–6
21. Artru AA: Relationship between cerebral blood volume and CSF pressure during anesthesia with isoflurane or fentanyl in dogs. *ANESTHESIOLOGY* 1984; 60:575–9
22. Artru AA: Reduction of cerebrospinal fluid pressure by hypocapnia: Changes in cerebral blood volume, cerebrospinal fluid volume and brain tissue water and electrolytes, II: Effects of anesthetics. *J Cereb Blood Flow Metab* 1988; 8:750–6
23. Kuhl DE, Reivich M, Alavi A, Nyary I, Staum MM: Local cerebral blood volume determined by three-dimensional reconstruction of radionuclide scan data. *Circ Res* 1975; 36:610–9
24. Phelps ME, Huang SC, Hoffman EJ, Kuhl DE: Validation of tomographic measurement of cerebral blood volume with C-11-labeled carboxyhemoglobin. *J Nucl Med* 1979; 20:328–34
25. Grubb RL, Raichle ME, Higgins CS, Eichling JO: Measurement of regional cerebral blood volume by emission tomography. *Ann Neurol* 1978; 4:322–8
26. Sakai F, Nakazawa K, Tazaki Y, Ishii K, Hino H, Igarashi H, Kanda T: Regional cerebral blood volume and hematocrit measured in normal human volunteers by single-photon emission computed tomography. *J Cereb Blood Flow Metab* 1985; 5:207–13
27. Fortune JB, Feustel PJ, deLuna C, Graca L, Hasselbart J, Kupinski AM: Cerebral blood flow and blood volume in response to O<sub>2</sub> and CO<sub>2</sub> changes in normal humans. *J Trauma* 1995; 39:463–71
28. Archer DP, Lebreque P, Tyler JL, Meyer E, Trop D: Cerebral blood volume is increased in dogs during administration of nitrous oxide or isoflurane. *ANESTHESIOLOGY* 1987; 67:642–8
